# Supplementary material
Source: PubMed Central journal article supplement (PMC4105238)
Supplement: 1400296_JI_1400296_Supplemental_Figure_1.pdf [file 1400296_JI_1400296_Supplemental_Figure_1.pdf]

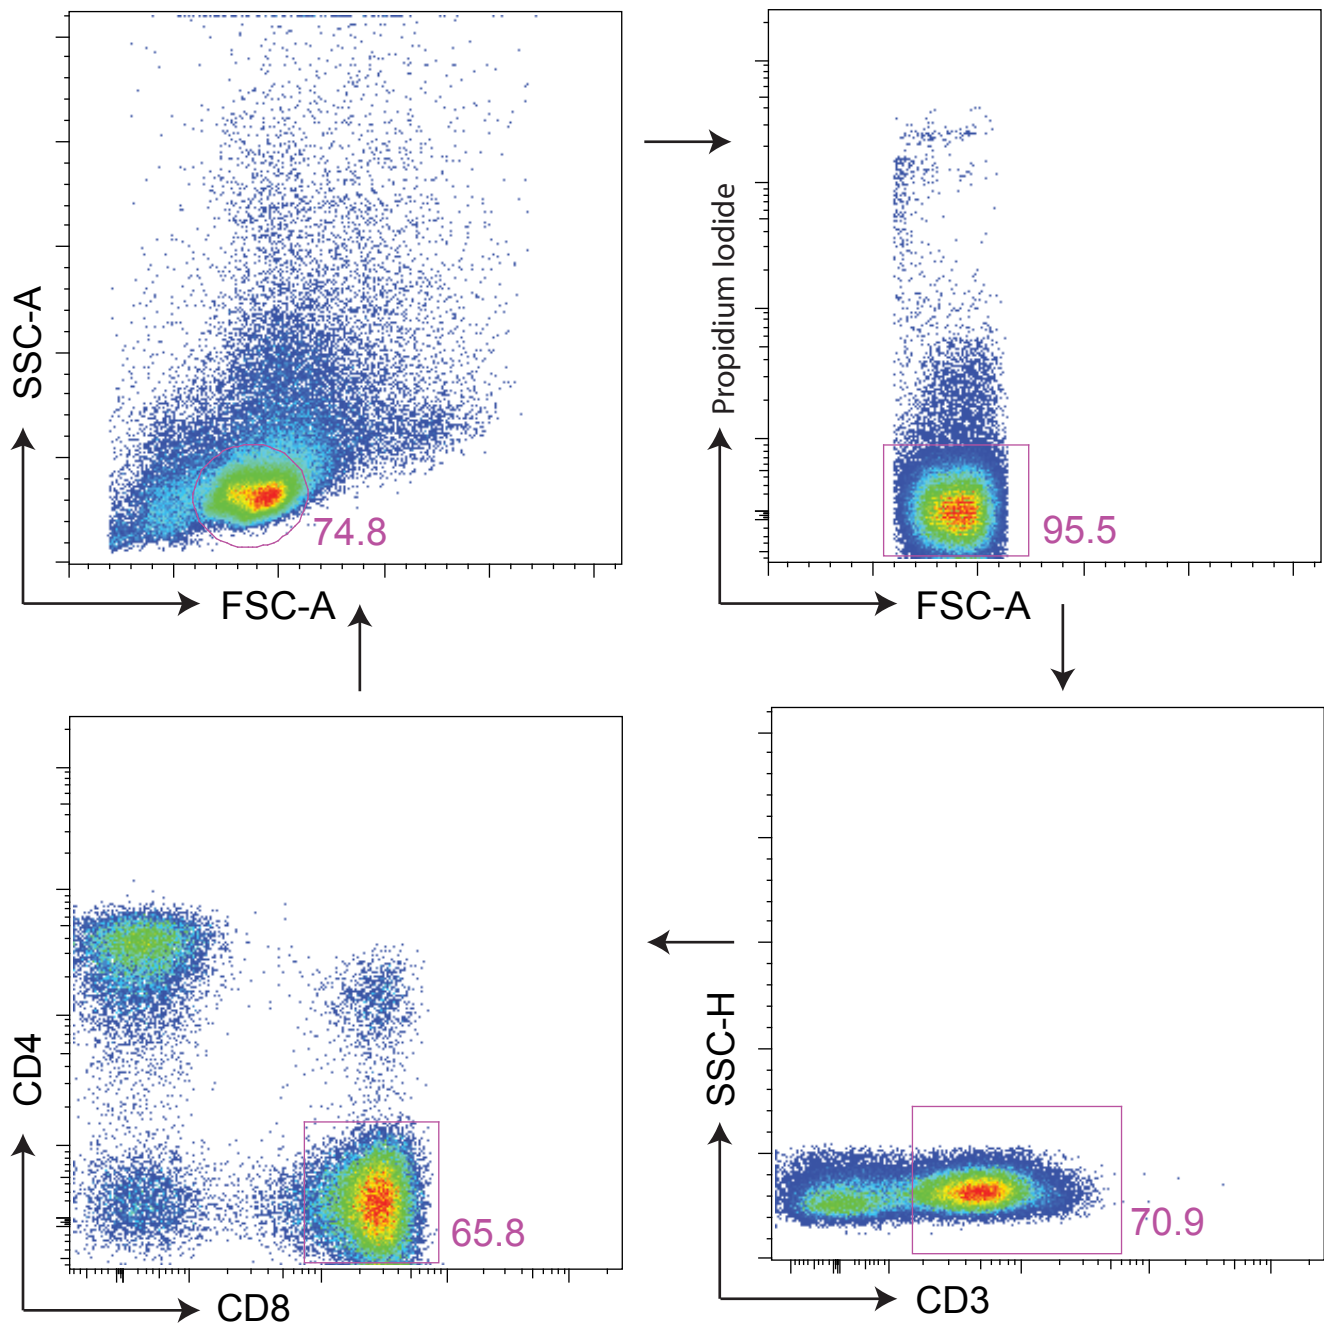

**Supplementary Figure 1.** Gating strategy for sorting CD8<sup>+</sup> cells from mouse livers used in ILSDA. Liver lymphocytes were initially gated based on forward and side scattering (top left panel). Dead cells were excluded based on propidium iodide staining (top right panel). CD3<sup>+</sup> T cells (bottom right panel) were further separated into CD4<sup>+</sup> and CD8<sup>+</sup> T cells (bottom left panel).
